# Supplementary material for: Phenotype and predictors of insulin independence in adults presenting with diabetic ketoacidosis: a prospective cohort study
Source: PubMed Central journal article supplement (PMC10844464; doi:10.1007/s00125-023-06067-3), 2024-01-19
Supplement: 125_2023_6067_MOESM1_ESM.pdf [file 125_2023_6067_MOESM1_ESM.pdf]

## Electronic Supplementary Material

**ESM Table 1. New onset vs previously-diagnosed diabetes: baseline demographics**

| Characteristic                                  | All<br>n=103     | New-onset DM<br>n=88 | Previously<br>diagnosed DM<br>n=15 | P       |
|-------------------------------------------------|------------------|----------------------|------------------------------------|---------|
| <b>Demographics</b>                             |                  |                      |                                    |         |
| Age (years)                                     | 35±16            | 34±14                | 47±13                              | < 0.001 |
| Male sex                                        | 55 (53)          | 50 (57)              | 5 (33)                             | 0.08    |
| Ethnicity                                       |                  |                      |                                    | 0.577   |
| Black                                           | 60 (58)          | 50 (57)              | 10 (67)                            |         |
| Mixed ethnicity (SA coloured) <sup>a</sup>      | 43 (42)          | 38 (43)              | 5 (33)                             |         |
| <b>Clinical history</b>                         |                  |                      |                                    |         |
| Family history of diabetes                      | 52 (51)          | 46 (52)              | 6 (40)                             | 0.416   |
| History of other metabolic disease <sup>b</sup> | 22 (21)          | 16 (6)               | 6 (405)                            | 0.007   |
| HIV diagnosis                                   | 5 (5)            | 4 (5)                | 1 (7)                              | 0.552   |
| History of smoking <sup>†</sup>                 | 35 (34)          | 33 (38)              | 2 (13)                             | 0.082   |
| History of alcohol use <sup>†</sup>             | 47 (46)          | 42 (48)              | 5 (33)                             | 0.403   |
| Precipitant identified                          | 32 (31)          | 22 (25)              | 10 (67)                            | 0.002   |
| Precipitated by infection                       | 28 (27)          | 20 (23)              | 8 (53)                             | 0.012   |
| <b>Examination</b>                              |                  |                      |                                    |         |
| BMI (kg/m <sup>2</sup> )                        | 28.3 (23.0-33.2) | 28.5 (23.3-33.4)     | 25.8 (22.3-31.9)                   | 0.253   |
| BMI < 18.5 kg/m <sup>2</sup>                    | 3 (3)            | 3 (3)                | 0                                  | 0.62    |
| BMI 18.5 - 24.9 kg/m <sup>2</sup>               | 30 (30)          | 24 (28)              | 6 (43)                             | 0.239   |
| BMI 25 - 29.9 kg/m <sup>2</sup>                 | 26 (25)          | 22 (25)              | 4 (27)                             | 0.558   |
| BMI 30 - 39.9 kg/m <sup>2</sup>                 | 30 (29)          | 27 (31)              | 3 (20)                             | 0.305   |
| BMI > 40 kg/m <sup>2</sup>                      | 13 (13)          | 12 (14)              | 1 (7)                              | 0.4     |
| Acanthosis nigricans present                    | 58 (56)          | 52 (59)              | 6 (40)                             | 0.26    |

|                                     |                  |                  |                  |       |
|-------------------------------------|------------------|------------------|------------------|-------|
| Systolic blood pressure (mmHg)      | 126±17           | 127±17           | 119±16           | 0.093 |
| Diastolic blood pressure (mmHg)     | 79±11            | 79±12            | 76±11            | 0.203 |
| <b>Admission Investigations</b>     |                  |                  |                  |       |
| Glucose (mmol/l)                    | 27.8 (23.2-44.0) | 27.9 (23.6-44.0) | 26.0 (19.4-44.0) | 0.385 |
| pH                                  | 7.15 (7.04-7.22) | 7.15 (7.04-7.22) | 7.15 (7.01-7.23) | 0.866 |
| Bicarb (mmol/l)                     | 9.8 (6.7-12.3)   | 27.9 (23.6-44.0) | 9.8 (5.8-11.7)   | 0.716 |
| <b>Investigations</b>               |                  |                  |                  |       |
| HbA <sub>1c</sub> (mmol/mol)        | 113±22           | 113±21           | 123±22           |       |
| HbA <sub>1c</sub> (%)               | 12.5±2.0         | 12.4±1.9         | 13.4±2.0         | 0.059 |
| Creatinine (umol/l)                 | 61.9±15.7        | 62.0±15.3        | 61.1±18.4        | 0.457 |
| Total cholesterol (mmol/l)          | 5.0±1.2          | 4.9±1.2          | 5.5±1.2          | 0.088 |
| Triglycerides (mmol/l)              | 1.6±0.8          | 1.6±0.7          | 1.7±1.0          | 0.712 |
| HDL cholesterol (mmol/l)            | 1.4±0.5          | 1.3±0.5          | 1.5±0.5          | 0.237 |
| LDL cholesterol (mmol/l)            | 2.9±1.0          | 2.9±1.0          | 3.3±0.7          | 0.092 |
| Trig/HDL Ratio                      | 1.2±1.0          | 1.2±1.2          | 1.1±0.4          | 0.783 |
| <b>Bloods phenotype</b>             |                  |                  |                  |       |
| Fasting plasma glucose ( mmol/l)    | 9.7±9.1          | 11.2 ± 6.6       | 12.9±7.9         | 0.189 |
| Fasting c-peptide ( nmol/L)         | 0.30 (0.17-0.53) | 0.33 (0.17-0.62) | 0.20 (0.07-0.50) | 0.074 |
| C-peptide:glucose (nmol/mmol x 100) | 3.13 (1.45-6.00) | 3.43 (1.47-6.83) | 2.02 (0.89-3.84) | 0.015 |
| Fasting c-peptide > 0.3 nmol/l      | 54 (53)          | 50 (57)          | 4 (29)           | 0.081 |
| Fasting c-peptide > 0.2 nmol/l      | 74 (72)          | 65 (74)          | 9 (60)           | 0.351 |
| Anti-GAD +ve (>10 IU/ml)            | 23 (22)          | 20 (23)          | 3 (20)           | 0.558 |
| Anti-IA2 +ve (> 10 IU/ml)           | 11 (11)          | 11 (13)          | 0                | 0.36  |
| Antibody (GAD or IA2) +ve           | 28 (27)          | 25 (28)          | 3 (20)           | 0.371 |

Data are mean±SD, n (%), or median (IQR) unless otherwise stated. P value is for Mann Whitney U test for continuous variables and Chi<sup>2</sup> test or Fisher's exact for the categorical variables. <sup>a</sup>Ethnicity was self-identified based on current official South African population group classification <sup>b</sup>History of other metabolic disease = history of hypertension, peripheral vascular disease, cerebrovascular disease, ischaemic heart disease, dyslipidaemia, polycystic ovarian syndrome or gestational diabetes. History of smoking and history of alcohol use was defined as any smoking or alcohol use at all in the year before admission.

**ESM Table 2. Baseline characteristics of patients admitted with DKA, classified into A $\beta$  groups**

| <b>Characteristic</b>                           | <b>A-<math>\beta</math>-</b><br>(n = 22) | <b>A-<math>\beta</math>+</b><br>(n = 41) | <b>A+<math>\beta</math>-</b><br>(n = 16) | <b>A+<math>\beta</math>+</b><br>(n = 9) | <b>p-value</b> |
|-------------------------------------------------|------------------------------------------|------------------------------------------|------------------------------------------|-----------------------------------------|----------------|
| <b>Demographics</b>                             |                                          |                                          |                                          |                                         |                |
| Age (years)                                     | 36 $\pm$ 9                               | 36 $\pm$ 11                              | 31 $\pm$ 10                              | 38 $\pm$ 10                             | 0.231          |
| Male sex                                        | 16 (27)                                  | 19 (46)                                  | 9 (56)                                   | 6 (67)                                  | 0.216          |
| Ethnicity                                       |                                          |                                          |                                          |                                         |                |
| Black                                           | 15 (68)                                  | 24 (59)                                  | 6 (38)                                   | 5 (56)                                  | 0.302          |
| <b>Clinical history</b>                         |                                          |                                          |                                          |                                         |                |
| Family history of diabetes                      | 13 (59)                                  | 24 (59)                                  | 6 (38)                                   | 3 (33)                                  | 0.29           |
| History of other metabolic disease <sup>b</sup> | 5 (23)                                   | 8 (19)                                   | 2 (22)                                   | 1 (11)                                  | 0.8            |
| HIV diagnosis                                   | 0                                        | 4 (10)                                   | 0                                        | 0                                       | 0.187          |
| History of smoking                              | 7 (32)                                   | 16 (39)                                  | 9 (56)                                   | 1 (11)                                  | 0.144          |
| History of alcohol use                          | 15 (68)                                  | 15 (37)                                  | 8 (50)                                   | 4 (44)                                  | 0.122          |
| Precipitant identified                          | 7 (32)                                   | 11 (27)                                  | 3 (19)                                   | 1 (11)                                  | 0.527          |
| <b>Examination</b>                              |                                          |                                          |                                          |                                         |                |
| BMI (kg/m <sup>2</sup> )                        | 26.0 (22.4-28.7)                         | 32.7 (28.7-38.4)                         | 23.1 (20.1-27.0)                         | 34.0 (25.4-41.4)                        | <0.001         |
| Acanthosis nigricans present                    | 10 (46)                                  | 36 (88)                                  | 1 (6)                                    | 5 (56)                                  | < 0.001        |
| Systolic blood pressure (mmHg)                  | 124 $\pm$ 16                             | 131 $\pm$ 16                             | 121 $\pm$ 16                             | 133 $\pm$ 20                            | 0.095          |
| Diastolic blood pressure (mmHg)                 | 77 $\pm$ 10                              | 83 $\pm$ 12                              | 73 $\pm$ 11                              | 80 $\pm$ 8                              | 0.045          |
| <b>Admission Investigations</b>                 |                                          |                                          |                                          |                                         |                |
| Glucose (mmol/l)                                | 29.9 (25.8-44.0)                         | 27.8 (23.8-36.5)                         | 25.1 (20.2-40.5)                         | 30.0 (24.6-47.5)                        | 0.401          |
| pH                                              | 7.14 (6.97-7.18)                         | 7.19 (7.05-7.25)                         | 7.06 (6.91-7.14)                         | 7.15 (7.13-7.22)                        | 0.016          |
| Bicarb (mmol/l)                                 | 10.3 (5.7-12.4)                          | 11.1 (7.4-13.9)                          | 7.7 (3.9-9.0)                            | 10.6 (8.4-11.9)                         | 0.023          |

**Investigations**

|                              |            |            |            |            |       |
|------------------------------|------------|------------|------------|------------|-------|
| HbA <sub>1c</sub> (mmol/mol) | 115±24     | 110± 21    | 110± 20    | 121± 15    |       |
| HbA <sub>1c</sub> %          | 12.72.2    | 12.2± 1.9  | 12.2± 1.8  | 13.2± 1.4  | 0.34  |
| Creatinine (umol/l)          | 59.2± 17.8 | 64.1± 13.7 | 55.6± 13.7 | 71.2± 13.6 | 0.063 |
| Total cholesterol (mmol/l)   | 4.9±1.0    | 4.8± 1.3   | 5.1± 0.8   | 4.8± 1.3   | 0.639 |
| Triglycerides (mmol/l)       | 1.3±0.7    | 1.7± (0.7  | 1.1± 0.5   | 2.3± 0.9   | 0.002 |
| HDL cholesterol (mmol/l)     | 1.5± 0.6   | 1.1 ±0.    | 1.8± 0.8   | 1.1± 0.3   | 0.002 |
| LDL cholesterol (mmol/l)     | 2.9± 0.9   | 2.9±1.2    | 2.8± 0.8   | 2.7± 1.2   | 0.934 |

**Outcome**

|                          |        |         |   |        |         |
|--------------------------|--------|---------|---|--------|---------|
| Off insulin at 12 months | 9 (41) | 28 (68) | 0 | 3 (33) | < 0.001 |
| Off insulin at 60 months | 6 (27) | 15 (37) | 0 | 2 (22) | 0.04    |

Data are mean±SD, n (%), or median (IQR) unless otherwise stated. P value is for Mann Whitney U test for continuous variables and Chi<sup>2</sup> test or Fisher's exact for the categorical variables. <sup>a</sup>Ethnicity was self-identified based on current official South African population group classification <sup>b</sup>History of other metabolic disease = history of hypertension, peripheral vascular disease, cerebrovascular disease, ischaemic heart disease, dyslipidaemia, polycystic ovarian syndrome or gestational diabetes. History of smoking and history of alcohol use was defined as any smoking or alcohol use at all in the year before admission.

A+ = IA2 or anti-Gad positive; β+ = beta cell positive (fasting c-peptide > 0.3 nmol/l)

ESM Figure 1. HbA<sub>1c</sub> over time between AB subgroups

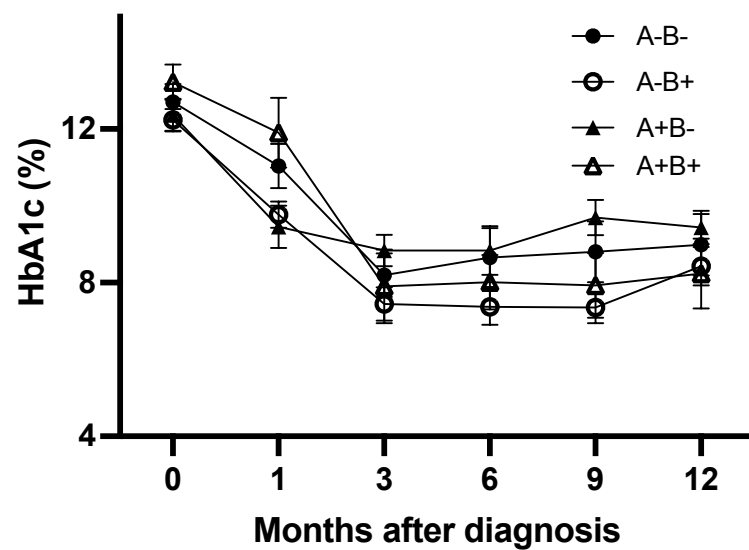

A+ = IA2 or anti-GAD positive; B+ = beta cell positive (fasting c-peptide > 0.3nmol/l)
